# Supplementary material for: Computational Indicator Approach for Assessment of Nanotoxicity of Two-Dimensional Nanomaterials
Source: MDPI journal article supplement (doi:10.3390/nano12040650), 2022-02-15
Supplement: s1 [file s1]

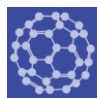

# Computational Indicator Approach for Assessment of Nanotoxicity of Two-Dimensional Nanomaterials

Alexey A. Tsukanov <sup>1,2,\*</sup>, Boris Turk <sup>3</sup>, Olga Vasiljeva <sup>3,\*†</sup> and Sergey G. Psakhie <sup>2,‡</sup>

<sup>1</sup> Center for Computational and Data-Intensive Science and Engineering (CDISE), Skolkovo Institute of Science and Technology (Skoltech), 121205 Moscow, Russia

<sup>2</sup> Institute of Strength Physics and Materials Science of SB RAS, 634055 Tomsk, Russia;

<sup>3</sup> Department of Biochemistry and Molecular and Structural Biology, Jozef Stefan Institute, SI-1000 Ljubljana, Slovenia; boris.turk@ijs.si

\* Correspondence: a.tsukanov@skoltech.ru (A.A.T.); olga.vasiljeva@ijs.si (O.V.)

† Present Address: CytomX Therapeutics, Inc., South San Francisco, CA 94080, USA.

‡ Deceased.

## 1. SIMULATION DETAILS

### Calculation of the free energy of lipid extraction

Constant velocity steered molecular dynamic (SMD) [1] simulations were performed to estimate free energy change during the single and a group of 2 and 3 lipids complete extraction from POPC bilayer into the bulk water solution.

Initial dimensions of the simulation box were  $60 \times 60 \times 154$  Å. The model membrane was composed of 106 lipids (53 in each leaflet). The membrane was oriented in XY plane and its center of mass was restrained to the plane  $Z = 0$  by the stiff spring with a constant  $30000 \text{ kJ}/(\text{mol} \cdot \text{Å}^2)$ . Membrane model was generated using CHARMM-GUI v2.0 (<http://www.charmm-gui.org>) [2] and was parameterized with CHARMM36 force field [3]. Total number of atoms was 52 396, including 12 708 water molecules and 34  $\text{Na}^+$  and 34  $\text{Cl}^-$  ions. The periodic boundary conditions were set along all the directions. System was modelled as isothermal-isobaric (NpT) ensemble at  $T = 310 \text{ K}$  and  $p = 1 \text{ atm}$  with a Nose–Hoover algorithm [4,5]. Dimensions of simulation box were changeable to provide target pressure. X and Y dimensions were coupled, while Z was changing independently. Long-range electrostatics was computed with particle-particle particle-mesh (PPPM) algorithm [6,7].

In order to estimate free energy change ( $\Delta G$ ) of the system during the N lipids extraction, the PMF was calculated as the sum of the works done by N virtual springs with constant of  $2000 \text{ kJ}/(\text{mol} \cdot \text{Å}^2)$ , with one end of which attached to the center of mass of one from N lipids in the group and the other end moved at a constant velocity  $0.1 \text{ Å/ns}$  away from membrane and along Z. The X and Y components of the virtual force were zero.

The molecular dynamics models and other simulations-related data can be found at [8,9].

## 2. SUPPLEMENTAL RESULT DETAILS

**Table S1.** Quantitative parameters of  $\Delta G$  profiles estimated for head and tail moieties of the POPC lipid interacting with the two-dimensional nanomaterials. M – point of local minimum, B – energy barrier,  $\Delta G$  – an estimation of the free energy change, SD – standard deviation of  $\Delta G$  (error estimation),  $\xi$  – distance between nanosheet and adsorbate molecule center of mass.

| Nanomaterial        | Lipid part | Min./Barrier | $\Delta G$ , kJ/mol | SD, kJ/mol | $\xi$ , Å |
|---------------------|------------|--------------|---------------------|------------|-----------|
| GN                  | head       | M            | -14.2               | 1.62       | 4.75      |
|                     | tails      | M            | -102.69             | 10.92      | 4.13      |
| GON                 | head       | M            | -19.17              | 4.08       | 4.84      |
|                     | tails      | M            | -29.64              | 14.04      | 5.21      |
| Mg/Al-LDH           | head       | M4           | -0.3                | 0.19       | 12.64     |
|                     |            | M3           | -0.61               | 0.28       | 10.17     |
|                     |            | B2           | 1.1                 | 0.37       | 9.06      |
|                     |            | M2           | -2.29               | 0.61       | 8.08      |
|                     |            | B1           | 5.09                | 1.08       | 6.84      |
|                     |            | M1           | -3.47               | 1.41       | 6.17      |
|                     | tails      | (M)          | 0                   | 0.12       | (inf)     |
| Aloohene            | head       | M'           | -3.78               | 1.23       | 6.32      |
|                     |            | M            | -5.16               | 1.26       | 5.76      |
|                     | tails      | (M)          | -0.029              | 0.046      | (16.04)   |
| BNN ( $\pm 0.5$ e)  | head       | M            | -15.61              | 6.55       | 4.82      |
|                     | tails      | M            | -117.51             | 3.63       | 4.02      |
| BNN ( $\pm 1.05$ e) | head       | M            | -20.2               | 2.71       | 4.66      |
|                     | tails      | M            | -115.35             | 11.91      | 4.02      |

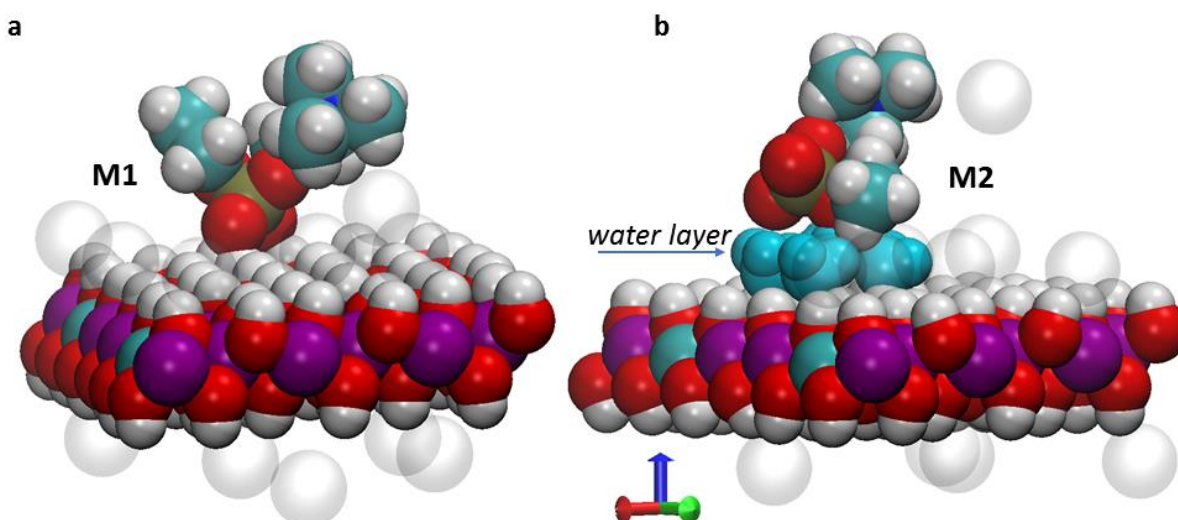

**Figure S1.** Configurations of head part of POPC lipid adsorbed at local minima M1 (a)  $\xi = 6.17$  Å and M2 (b)  $\xi = 8.08$  Å on the surface of Mg/Al-LDH. Water is not shown, except several molecules, which form single-molecule-thin water layer between LDH surface and  $\text{PO}_4$ -group of a lipid head. Colors: aluminum – cyan, magnesium – purple, carbon – cyan, oxygen – red, hydrogen – white, phosphorus – golden, nitrogen – blue, chlorine ions – transparent, water – light blue.

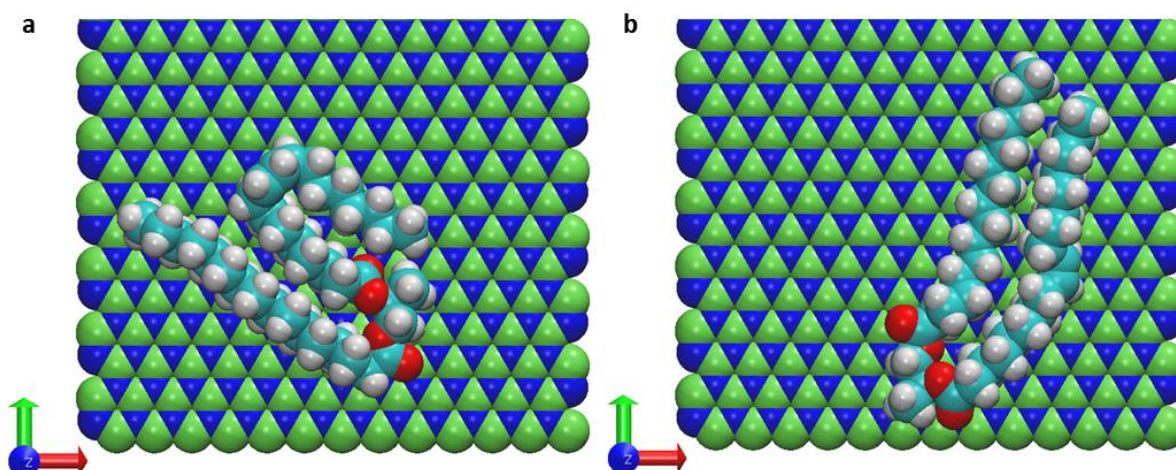

**Figure S2.** Typical configurations of tails part of POPC lipid adsorbed on the surface of BNN (near point of local minimum M,  $\xi = 4.02$  Å). Colors: boron – green, nitrogen – blue, carbon – cyan, oxygen – red, hydrogen – white.

## References

1. Izrailev, S.; Stepaniants, S.; Isralewitz, B.; Kosztin, D.; Lu, H.; Molnar, F.; Wriggers, W.; Schulten, K. *Steered Molecular Dynamics. Computational Molecular Dynamics: Challenges, Methods, Ideas*; Springer: Berlin, Germany, 1997; pp. 39–65.
2. Jo, S.; Lim, J.B.; Klauda, J.B.; Im, W. CHARMM-GUI Membrane Builder for mixed bilayers and its application to yeast membranes. *Biophys. J.* **2009**, *97*, 50–58.
3. Klauda, J.B.; Venable, R.M.; Freites, J.A.; O'Connor, J.W.; Tobias, D.J.; Mondragon-Ramirez, C.; Vorobyov, I.; MacKerell, A.D., Jr.; Pastor, R.W. Update of the CHARMM all-atom additive force field for lipids: Validation on six lipid types. *J. Phys. Chem. B* **2010**, *114*, 7830–7843.
4. Nosé, S. A molecular dynamics method for simulations in the canonical ensemble. *Mol. Phys.* **1984**, *52*, 255–268.
5. Hoover, W.G. Canonical dynamics: Equilibrium phase-space distributions. *Phys. Rev. A* **1985**, *31*, 1695–1697.
6. Hockney, R.W.; Goel, S.P.; Eastwood, J.W. A 10000 particle molecular dynamics model with long range forces. *Chem. Phys. Lett.* **1973**, *21*, 589–591.
7. Hockney, R.W.; Eastwood, J.W. *Computer Simulation Using Particles*; CRC Press, Boca Raton, USA: 1988.
8. Molecular Dynamics Models and Related Data Will Be Available at GitHub Repository via Link. Available online: <https://github.com/AATsukanov/CIN2D> (accessed on 11 February 2022).
9. Available online: <https://tsukanov-lab.moy.su> (accessed on 11 February 2022).
